# Supplementary material for: The Ndc80 complex targets Bod1 to human mitotic kinetochores
Source: PubMed Central journal article supplement (PMC5717335; doi:10.1098/rsob.170099), 2017-11-15
Supplement: rsob170099supp1.pdf [file rsob170099supp1.pdf]

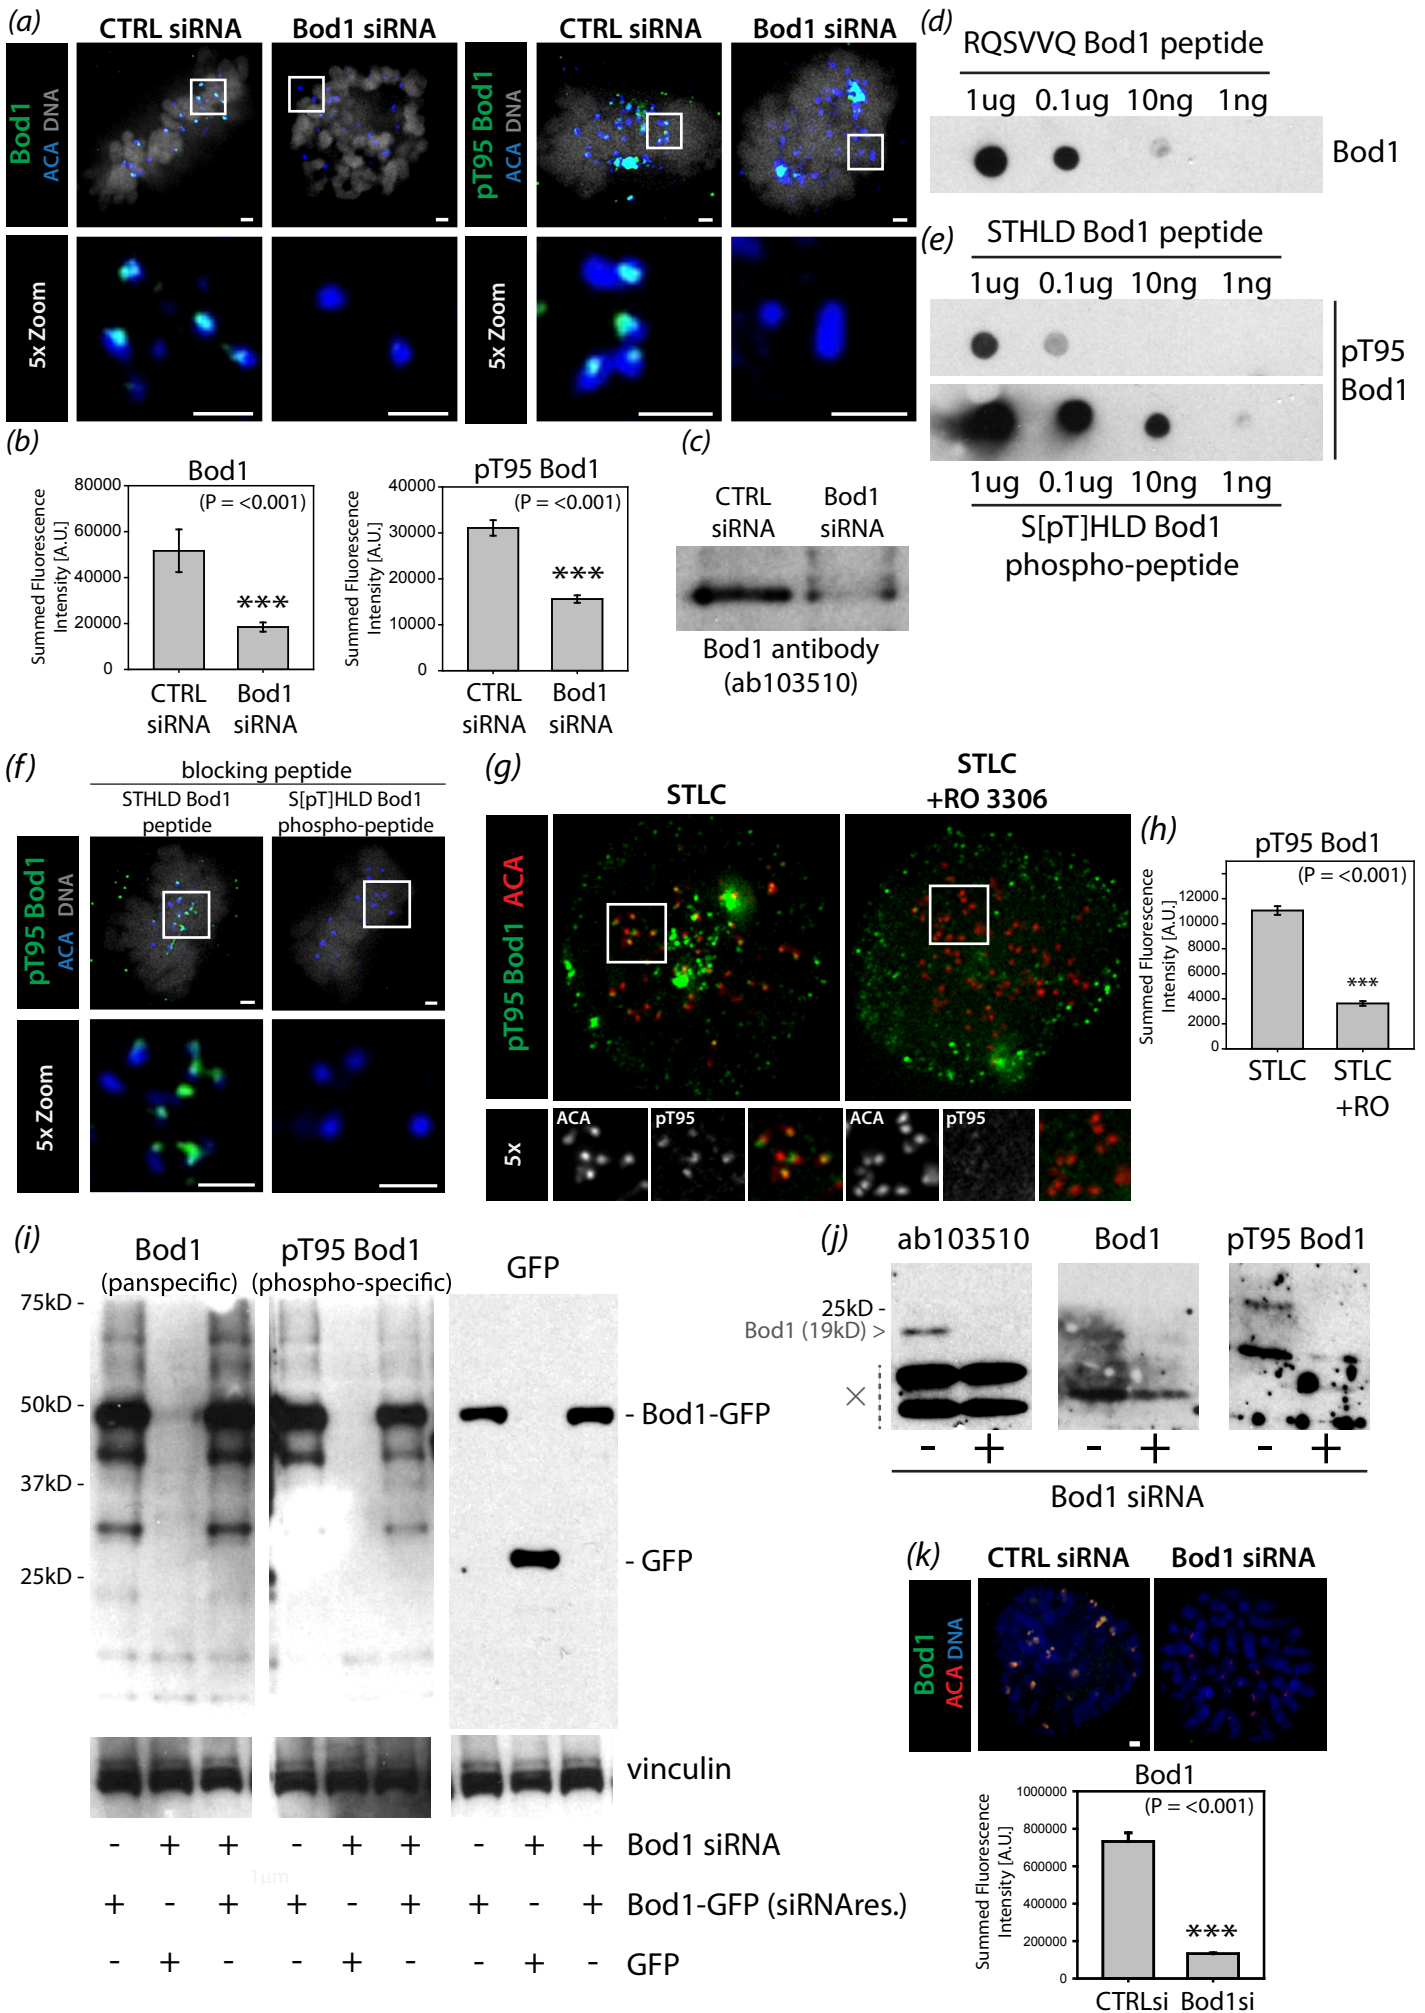

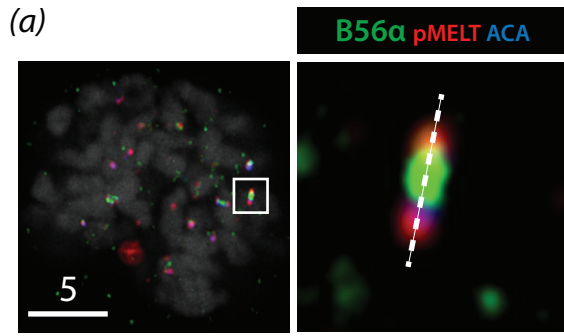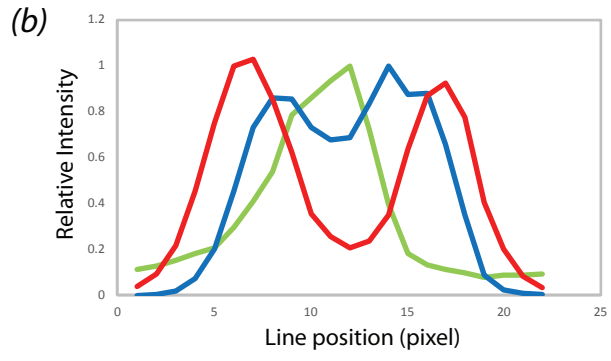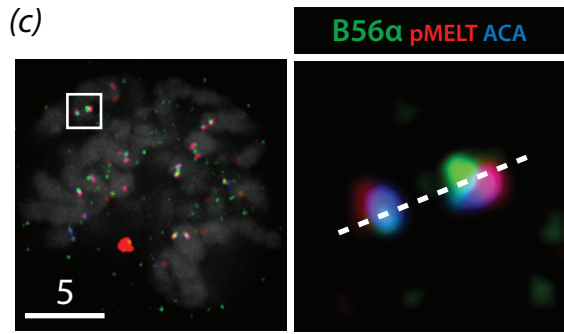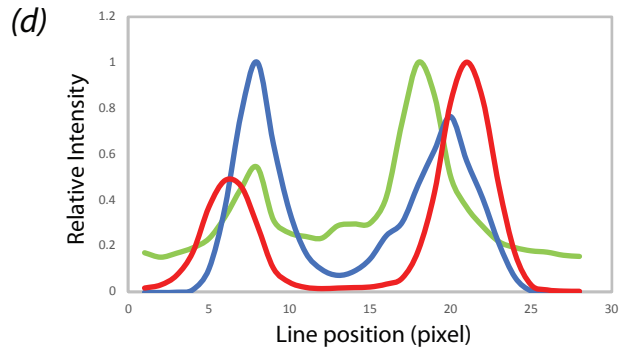

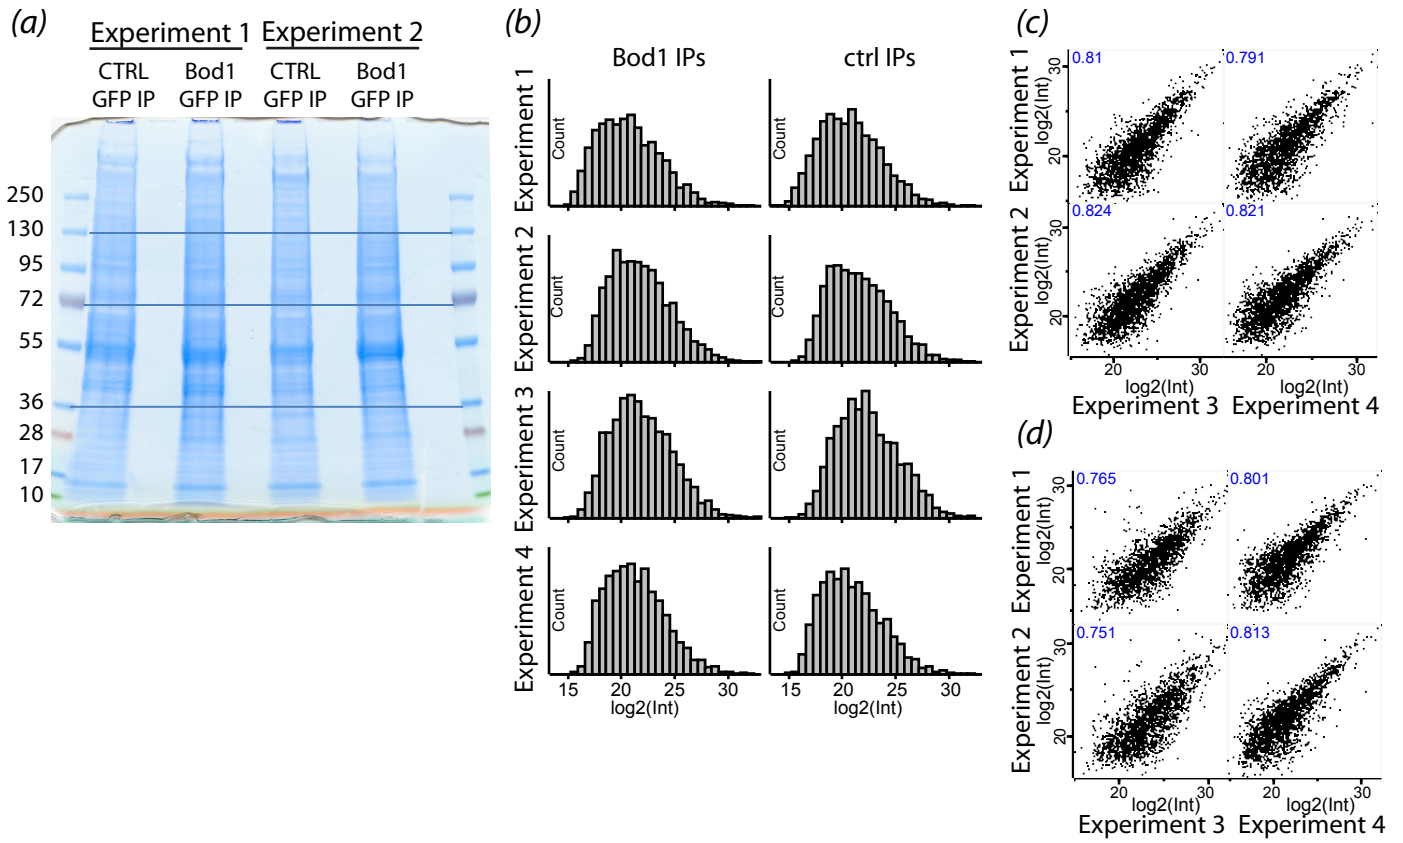

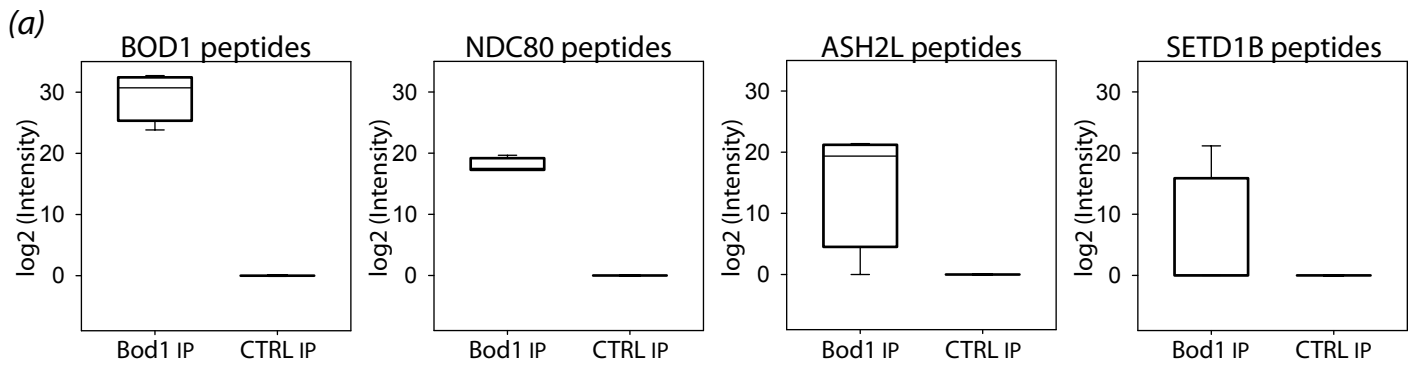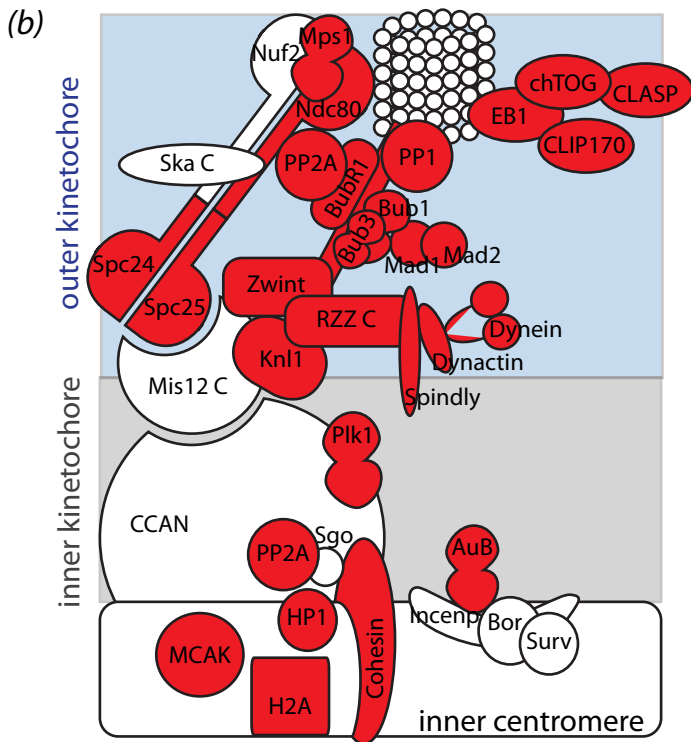



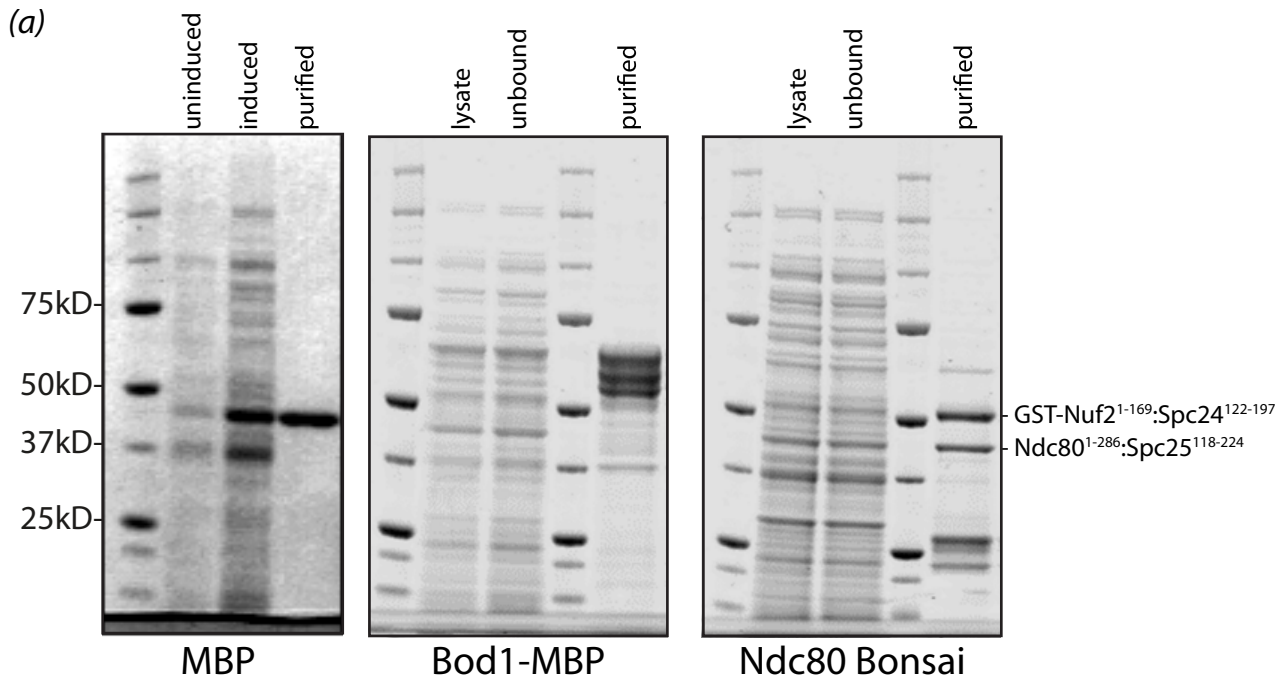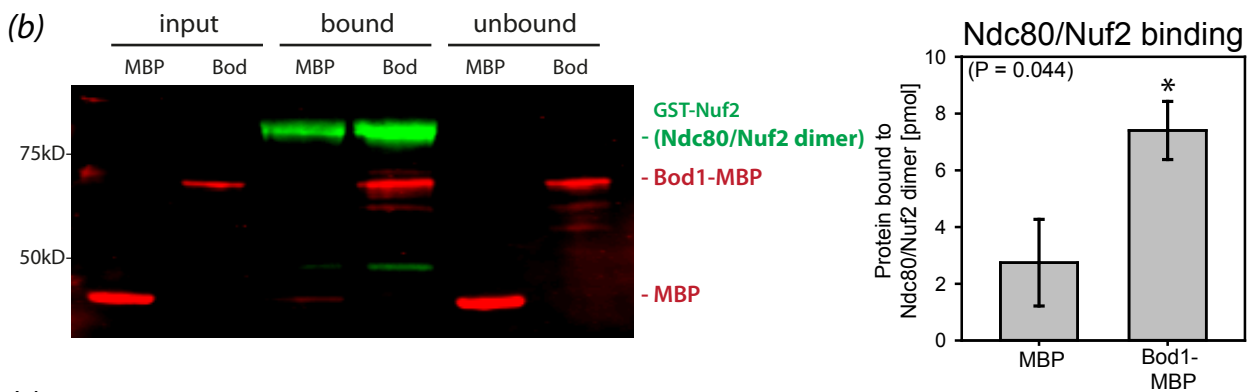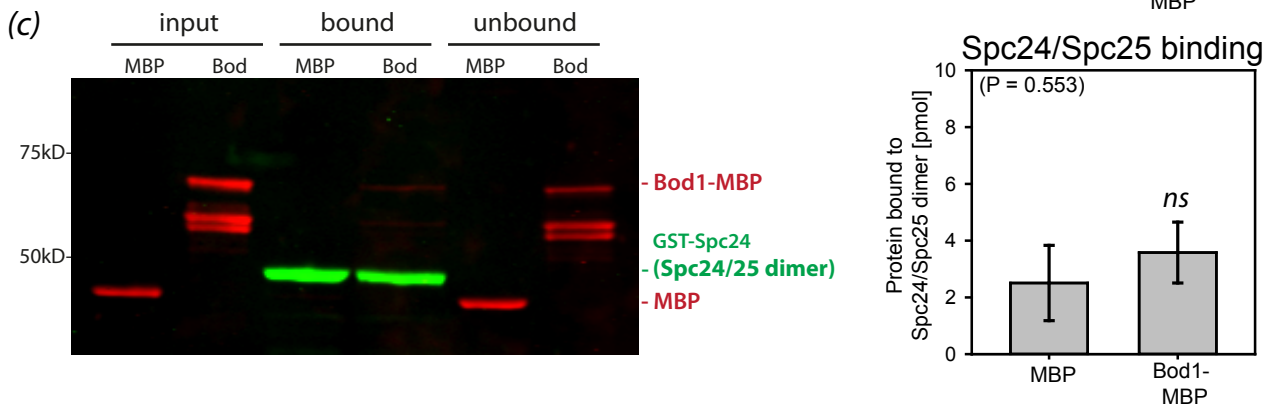

## Supplementary Figure Legends

**Figure S1. Extensive characterisation of Bod1-specific peptide antibodies in immunofluorescence and immunoblots.** (a) HeLa cells were treated with control or Bod1 siRNA for 48h. They were fixed in paraformaldehyde and stained with either the total Bod1-specific peptide antibody (left panels) or the pT95 Bod1 phospho-specific peptide antibody (right panels) as well as ACA (blue) and DAPI (grey). Bottom panels are magnifications of the indicated section of the same cell (white boxes). (b) Kinetochore intensity of antibody staining was determined. (c) Efficiency of Bod1 depletion in the same experiment was determined using immunoblotting with the commercial Bod1 antibody ab103510. (d) Dilution series of the total Bod1 antigenic peptide NH<sub>2</sub>-CRNGLRQSVVQS-COOH (R112–S122 of human Bod1) applied to a nitrocellulose membrane was used for a dot blot test of total Bod1 antibody affinity. (e) Dilution series of the pT95 Bod1 antigenic phosphopeptide NH<sub>2</sub>-CRQKVDNFVS[pT]HLDKQ-COOH (R86–Q100 of human Bod1) and corresponding non-phosphopeptide applied to a nitrocellulose membrane were used for a dot blot test of pT95 phospho-specific Bod antibody affinity. (f) The pT95 phospho-specific Bod1 peptide antibody was pre-treated with either the antigenic phosphopeptide or the corresponding non-phosphopeptide and then used in immunostaining of paraformaldehyde-fixed HeLa cells. Bottom panels are magnifications of the indicated section of the same cell (white boxes). (g) HeLa cells were treated with 5μM of the Eg5 inhibitor STLC over night to arrest them in prometaphase and maximise T95 phosphorylation. To test Cdk1-dependency of pT95 Bod1 phosphorylation, the Cdk1 inhibitor RO-3306 was applied at 10μM for 10min. Bottom panels are magnifications of the indicated section of the same cell (white boxes). Maximum Intensity projection of 7 consecutive z-slices taken 0.2μm apart is shown. (h) Kinetochore intensity of pT95 Bod1 staining was determined. (i) Bod1 panspecific and pT95 phospho-specific peptide

26 antibodies purified from sheep serum were used for immunoblots. Asynchronous whole cell  
27 lysates of HeLa cells overexpressing siRNA resistant Bod1-GFP or GFP were prepared as  
28 input. Vinculin was used as loading control. (j) Immunoblots of endogenous Bod1 from whole  
29 cell asynchronous HeLa cell lysates. Membranes were cropped at 30kD before incubation with  
30 the antibody to maximise affinity to the Bod1-specific band. An Abcam commercial antibody  
31 (ab103510) as well as total and pT95 Bod1 peptides antibodies were used. Cross indicates non-  
32 specific bands. (k) HeLa cells were treated with control or Bod1 siRNA for 48h. They were  
33 fixed in paraformaldehyde and stained with the total Bod1-specific peptide antibody. Prophase  
34 cells were imaged and Bod1 kinetochore intensity was determined. Unless otherwise indicated,  
35 single z-sections are shown. Scale bars are 1  $\mu\text{m}$ . Pairwise comparisons were evaluated by  
36 unpaired Student's t-test. Two-tailed p-values are shown. n = 10 cells per condition. Error bars  
37 represent standard error.

38 **Figure S2. Localisation of PP2A-B56 $\alpha$  to inner and outer kinetochore**  
39 **compartments.** HeLa cells were fixed in paraformaldehyde and stained with a PP2A-B56 $\alpha$   
40 isoform-specific antibody (green), a marker for the centromeric region (ACA, blue), and a  
41 marker for the outer kinetochore (pMELT, red). (a) Prometaphase cell with maximal  
42 centromeric PP2A-B56 $\alpha$  targeting was imaged. The last panel is a magnification of the same  
43 cell (section indicated by white box). Single z-sections are shown. Scale bars are 5  $\mu\text{m}$ . (b)  
44 Normalised line intensity profile through dashed white line in (a). (c) Prometaphase cell with  
45 maximal PP2A-B56 $\alpha$  kinetochore targeting was imaged. Last panel is a magnification of the  
46 same cell (section indicated by white box). Single z-sections are shown. Scale bars are 5  $\mu\text{m}$ .  
47 (d) Normalised line intensity profile through dashed white line in (c).

48

49 **Figure S3. Mass spectrometry experiment to find Bod1 interaction partners at the**  
50 **kinetochore.** (a) Coomassie gel of the first two biological replicates of Bod1-GFP and GFP  
51 control affinity purifications analysed by mass spectrometry. Blue horizontal lines indicate  
52 where the gel was cut to fractionate each lane into four gel pieces. (b) Histograms for the  
53 intensity distribution of each experiment. (c) Intensity correlation between biological replicates  
54 of Bod1-GFP affinity purifications. Pearson correlation coefficient is shown in blue. (d)  
55 Intensity correlation between biological replicates of control GFP affinity purifications.  
56 Pearson correlation coefficient is shown in blue.

57 **Figure S4. Supplementary analysis of the mitotic Bod1 interactome.** (a) Box-and-  
58 whisker-plots of selected peptide intensities quantified by mass spectrometry in Bod1-GFP and  
59 control samples. n = 4 biological replicates. Statistical test used was an unpaired Student's t-  
60 test. Whiskers extend from minimum to maximum. (b) Graphic representation of well-  
61 characterised kinetochore and centromeric proteins. Proteins quantified in at least one of the  
62 four Bod1-GFP affinity purifications are coloured in red.

63 **Figure S5. *In vitro* pull down experiment to confirm interaction between Bod1 and**  
64 **Ndc80.** (a) Coomassie gels showing induction and purification of the indicated proteins from  
65 BL21 cells. (b, c) 150pmol recombinant Ndc80/Nuf2-GST dimer (b), or Spc24-GST/Spc25  
66 dimer (c) [1], subcloned in a modified pGEX-6P vector (pGEX-6P-2RBS) to support  
67 dicistronic expression, were expressed in BL21 cells and immobilised on Sepharose beads.  
68 They were then incubated with 1nmol Bod1-MBP or MBP. Binding was allowed for 1h.  
69 Proteins were resolved by SDS-PAGE and immunoblotted using simultaneous detection of the  
70 MBP (red) epitope tag on Bod1 and the GST (green) epitope tag on Nuf2 or Spc24. Amount  
71 of bound protein was quantified relative to the input. Asterisk represents significant difference  
72 in unpaired t-test. Two-tailed p-value is indicated. n = 4 separate experiments. Error bars  
73 represent standard error.

74           **Table S1. List of all proteins significantly enriched in Bod1-GFP affinity**  
75 **purifications.** This table includes all proteins detected by mass spectrometry that were  
76 significantly enriched in Bod1 samples as identified by an unpaired Student's t-test with a  
77 threshold p-value of 0.05. Significance is indicated with a "+" in the column "Student's T-test  
78 Significant". Degree of enrichment is displayed in column "log2 (fold Change Bod1/ctrl)",  
79 where high values correspond to a high degree of enrichment in Bod1-GFP samples.

80           **Table S2. List of all kinetochore and centromeric proteins detected as interactors**  
81 **of Bod1-GFP in mitotic HeLa cells.** Table includes all proteins that were quantified in at least  
82 one of the four in Bod1-GFP affinity purifications in the experiment described in figure 3 and  
83 had a GO annotation for either "kinetochore" or "centromeric region". Significant interactors,  
84 as identified in an unpaired Student's t-test with a threshold p-value of 0.05, are indicated with  
85 a "+" in the column "Student's T-test Significant".

86

87           **Supplementary references:**

- 88 1. Ciferri, C. et al. 2005 Architecture of the human Ndc80-Hec1 complex, a critical  
89 constituent of the outer kinetochore. *J. Biol. Chem.* **280**, 29088–29095.  
90 (doi:10.1074/jbc.M504070200)

91
